# Supplementary material
Source: Copernicus journal article supplement (doi:10.5194/essd-2026-31)
Supplement: Supplementary file 1 [file ESSD-2026-31-Supplement.pdf › ESSD-2026-31-Supplement.pdf]

# *Supplement of*

## **SISAL\_monv1: a global database of cave monitoring observations**

Treble et al.

- 5 The copyright of individual parts of the supplement might differ from the CC BY 4.0 License.

### **S1 Data Quality Control for Cave Monitoring database**

#### **S1.1 Pre-upload checks:**

An R script for automatic QC checks of the monitoring workbook. It loads, validates, and visualizes data from each worksheet. The script is available at [https://github.com/istvan60/SISAL\\_monv1/blob/main/QC%20script\\_v5.3.R](https://github.com/istvan60/SISAL_monv1/blob/main/QC%20script_v5.3.R)

- 10 **Note:** The file used to format and submit the speleothem records for the SISAL monitoring database (SISAL\_monitoringdb.xlsx) is available alongside the database in the repository at doi: 10.5158/ARP/29W5J3.

#### **S1.2 Automatic checks**

##### **Site table**

- Only one row allowed.
- 15 • site\_name must not start or end with a space.
- latitude  $\in [-90, 90]$ ; longitude  $\in [-180, 180]$ .
- elevation must be present.

##### **Reference table**

- All non-empty rows share the same site\_name.
- 20 • Each citation maps to a single publication\_doi.
- Duplicate DOIs link to identical citations (unless “unpublished”).
- No repeated citations or DOIs.
- No spaces around publication\_doi; DOI must start with "10", "http://" or be "unpublished".
- No null site\_name or citation; table must have at least one row.

##### 25 **Precipitation site metadata table**

- Unique precip\_entity\_name.
- precip\_site\_name has no extra spaces.
- Valid precipitation lat/lon ranges.
- precip\_elevation and precip\_distance\_cave\_entrance must not be missing.

##### 30 **Precipitation entity metadata table**

- precip\_method from allowed list ("IAEA/GNIP", "other (see notes)", "unknown").
- precip\_entity\_contact is non-numeric, multi-word, without extra spaces.

##### **Precipitation sample table**

- precip\_accumulation\_unit valid (days, hours, minutes, unknown).
- 35 • Start/end date and time fields follow 4-digit year, 1–2 digit month/day, 4-digit hhmm format within ranges.
- Numeric checks for accumulation time, amount,  $\delta^{18}\text{O}$  &  $\delta^2\text{H}$  measurements and precisions.

### Cave entity metadata table

- Unique cave\_entity\_name.
- Flags (cave\_temperature, cave\_relative\_humidity, cave\_pCO<sub>2</sub>), frequency, and instrument fields from allowed options (yes, no, unknown, plus frequency/instrument lists).
- cave\_entity\_contact non-numeric, multi-word, no extra spaces.

### Drip entity metadata table

- Unique drip\_entity\_name.
- entity\_id integer 1–2000.
- drip\_entity\_contact non-numeric, multi-word.
- Geology and rock-age fields from predefined lists.
- Flags (drip\_iso, drip\_rate, mod\_carb) ∈ {yes,no,unknown}.

### Drip isotope sample

- drip\_iso\_accumulation\_unit ∈ {days,hours,minutes,seconds,unknown}.
- Date/time checks for start/end components.
- Numeric checks for accumulation time and isotope measurements/precision.

### Drip rate sample

- drip\_rate\_accumulation\_unit ∈ {days,hours,minutes,seconds,unknown}.
- Date/time checks for start/end.
- Numeric checks for accumulation time, measurement, precision.

### Modulated carbonate sample

- mod\_carb\_accumulation\_unit ∈ {years,months,days,unknown}.
- mod\_carb\_surface and mod\_carb\_mineralogy from allowed lists.
- Date/time checks for start/end.
- Numeric checks for accumulation time,  $\delta^{18}\text{O}$ /  $\delta^2\text{H}$  measurements and precisions.

## S1.3 Table integrity checks

- **Cross-table consistency (T15):**
  - site\_name present across site, reference, notes, precipitation-site tables.
  - precip\_entity\_name alignment across site-metadata, entity-metadata, sample tables.
  - cave\_entity\_name alignment across entity-metadata and sample sheets.
  - drip\_entity\_name alignment across entity-metadata and sample sheets.
  - At least one reference row exists.

## S2 Output reports

### S2.1 Text QC summary

- write\_vars\_to\_pdf(): outputs PASS/FAIL summary of each check to text\_output\_<site>.pdf, coloring failures red.

### S2.2 Graphics outputs

- **World map** with site and precipitation locations labeled.
- **Zoomed-in map**  $\pm 5^\circ$  around the points.
- **Scatter of precip\_amount vs. precip\_accumulation\_time**, colored by unit.
- **Time series of precip\_amount** by entity over date.

80

- **Scatter & regression** of  $d^2H$  vs.  $d^{18}O$  for precipitation and drip-water, with Global Meteoric Water Line reference, annotated with regression equations and  $R^2$ .
- **Time-series plots** for each sample type (precipitation  $\delta^{18}O$ ,  $\delta^2H$ ; cave temperature, humidity,  $pCO_2$ ; drip-ISO  $\delta^{18}O$ ,  $\delta^2H$ ; drip rate; mod\_carb  $\delta^{18}O$ ,  $\delta^{13}C$ ), each only if data are present; otherwise blank pages with a “No data available” message.

### **S3 Manual checks (Analogous to plotting-based review):**

- Evaluate text and graphics output for anomalies not caught automatically (incorrect units, missing values, outliers).

85
